# Supplementary material for: Triage of Amyotrophic Lateral Sclerosis Patients during the COVID-19 Pandemic: An Application of the D50 Model
Source: PubMed Central journal article supplement (PMC7565659; doi:10.3390/jcm9092873), 2020-09-05
Supplement: jcm-09-02873-s001.pdf [file jcm-09-02873-s001.pdf]

## Supplementary material

**Table S1.** Demographic and Clinical Data for the entire prospective cohort, stratified by D50.

|                                                  | high aggressiveness<br>(D50 < 30)                                     | low aggressiveness<br>(D50 ≥ 30)                                    | P      |
|--------------------------------------------------|-----------------------------------------------------------------------|---------------------------------------------------------------------|--------|
| <i>n</i>                                         | 75                                                                    | 102                                                                 |        |
| Age at symptom onset [in years]                  | 65.8 ± 15.3 (63.3 - 69.8)                                             | 60.1 ± 14.6 (58.1 - 62.8)                                           | <.001* |
| Gender [male/ female]                            | 37/ 38; 49.3%/ 50.7%                                                  | 59/ 43; 57.8%/ 42.2%                                                | .287   |
| prior Assisted ventilation in Mar-2020 [no/ yes] | 33/ 42; 44.0%/ 56.0%                                                  | 60/ 42; 58.8%/ 41.2%                                                | .067   |
| symptom duration until ventilation [months]      | 16 ± 10 (14 - 19)                                                     | 39 ± 23 (36 - 49)                                                   | <.001* |
| prior Gastrostomy in Mar-2020 [no/ yes]          | 40/ 35; 53.3%/ 46.7%                                                  | 83/ 19; 81.4%/ 18.6%                                                | <.001* |
| symptom duration until Gastrostomy [months]      | 16 ± 15 (11 - 23)                                                     | 42 ± 43 (34 - 75)                                                   | <.001* |
| prior Death in Mar-2020 [no/ yes]                | 55/ 20; 73.3%/ 26.7%                                                  | 97/ 5; 95.1%/ 4.9%                                                  | <.001* |
| symptom duration until Death [months]            | 22 ± 19 (15 - 29)                                                     | 44 ± 50 (42 - 93)                                                   | <.001* |
| time since last ALSFRS-R [months]                | 4 ± 7 (3 - 6)                                                         | 3 ± 5 (3 - 4)                                                       | .011*  |
| ALSFRS-R [points]                                | 26 ± 20 (21 - 31)                                                     | 37 ± 19 (33 - 40)                                                   | <.001* |
| ALSFRS-R bulbar subsc.                           | 7 ± 8 (5 - 10)                                                        | 11 ± 3 (11 - 12)                                                    | <.001* |
| ALSFRS-R fine-motor subsc.                       | 5 ± 7 (4 - 7)                                                         | 8 ± 7 (8 - 9)                                                       | <.001* |
| ALSFRS-R gross-motor subsc.                      | 5 ± 7 (4 - 7)                                                         | 7 ± 7 (6 - 9)                                                       | .005*  |
| ALSFRS-R ventilatory subsc.                      | 9 ± 6 (8 - 11)                                                        | 11 ± 5 (11 - 12)                                                    | .003*  |
| King's stage [I/ II/ III/ IVa / IVb/ V]          | 5/ 10/ 12/ 14/ 14/ 20;<br>6.7%/ 13.3%/ 16.0%/ 18.7<br>%/ 18.7%/ 26.7% | 17/ 31/ 16/ 7/ 26/ 5;<br>16.7%/ 30.4%/ 15.7%/<br>6.9 %/ 25.5%/ 4.9% | <.001* |
| MiToS stage [0/ I/ II/ III/ IV/ V]               | 19/ 14/ 8/ 8/ 6/ 20;<br>25.3%/ 18.7%/ 10.7%/<br>10.7%/ 8.0 %/ 26.7%   | 56/ 16/ 19/ 5/ 1/ 5;<br>54.9%/ 15.7%/ 18.6%/<br>4.9%/ 1.0 %/ 4.9%   | <.001* |

Metric variables are presented as median ± interquartile-range and 95%-Confidence-Intervals of the median, the *P*-values (uncorrected) refer to two-sample Mann-Whitney-U-tests. Categorical variables are presented as number and percentage, the *P*-Values refer to chi-square or Fischer-exact-tests were appropriate. For comparison purpose, traditionally used staging systems are given, as calculated from the latest available ALSFRS-R score, the time until last ALSFRS-R is calculated until the 1<sup>st</sup> March 2020. The King's Staging system allocates patients to Stages I (involvement of one clinical region) until IV (respiratory or nutritional failure), whilst the MiToS System describes Stages 0 (functional involvement) until IV (loss of independence in four domains), the Stages V depict patients' death respectively (Balendra et al., 2014; Chio, Hammond, Mora, Bonito, & Filippini, 2015; Roche et al., 2012).

Abbreviations: ALS = Amyotrophic Lateral Sclerosis; ALSFRS-R = ALS Functional Rating Scale (revised), with bulbar subscore-sums of items 1-3, with fine-motor subscore-sums of items 4-6, with gross-motor

subscore-sums of items 7-9 and with ventilatory subscore-sums of items 10-12; MiToS = Milano-Torino Staging.

References:

- Balendra, R., Jones, A., Jivraj, N., Knights, C., Ellis, C. M., Burman, R., . . . Al-Chalabi, A. (2014). Estimating clinical stage of amyotrophic lateral sclerosis from the ALS Functional Rating Scale. *Amyotroph Lateral Scler Frontotemporal Degener*, 15(3-4), 279-284. doi:10.3109/21678421.2014.897357
- Chio, A., Hammond, E. R., Mora, G., Bonito, V., & Filippini, G. (2015). Development and evaluation of a clinical staging system for amyotrophic lateral sclerosis. *J Neurol Neurosurg Psychiatry*, 86(1), 38-44. doi:10.1136/jnnp-2013-306589
- Roche, J. C., Rojas-Garcia, R., Scott, K. M., Scotton, W., Ellis, C. E., Burman, R., . . . Al-Chalabi, A. (2012). A proposed staging system for amyotrophic lateral sclerosis. *Brain*, 135(Pt 3), 847-852. doi:10.1093/brain/awr351
